# Supplementary material for: A Comprehensive Computational NMR Analysis of Organic Polyarsenicals including the Marine Sponge-Derived Arsenicins A–D and Their Synthetic Analogs
Source: MDPI journal article supplement (doi:10.3390/md21100511), 2023-09-27
Supplement: s1 [file s1]

## Supplementary Materials

### A Comprehensive Computational NMR Analysis of Organic Polyarsenicals Including the Marine Sponge-Derived Arsenicins A-D and Their Synthetic Analogs

Andrea Defant \* and Ines Mancini \*

Laboratory of Bioorganic Chemistry, Department of Physics, University of Trento, Via Sommarive 14, I-38123 Trento, Italy

\* Correspondence: andrea.defant@ex-staff.unitn.it (A.D.); ines.mancini@unitn.it (I.M.)

#### Contents

**Table S1.** Calculated  $^1\text{H}$ -NMR chemical shifts of polyarsenicals **1-12** in chloroform by using combinations of methods (GIAO, CSGT), functionals (OLYP, M06-L, PBE1PBE, TPSSh) and the indicated basis sets; experimental values in  $\text{CDCl}_3$  for comparison, in redline. For the numbering of H and C atoms, see structures in Figure S1.

**Table S2.** Calculated  $^{13}\text{C}$ -NMR chemical shifts of polyarsenicals **1-12** in chloroform by using combinations of methods (GIAO, CSGT), functionals (OLYP, M06-L, PBE1PBE, TPSSh) and the indicated basis sets; experimental values in  $\text{CDCl}_3$  for comparison, in redline. For the numbering of H and C atoms, see structures in Figure S1.

**Figure S1.** Molecular structures (energy minimized using C-PCM in chloroform, B1B95/6-311+G(3df,2pd) of polyarsenicals **1-12** evaluated in the NMR calculations.

**Table S3.** xyz Coordinates of geometry optimized structures of compounds **1-12**.

**Table S1.** Calculated  $^1\text{H}$ -NMR chemical shifts of polyarsenicals **1-12** in chloroform by using combinations of methods (GIAO, CSGT), functionals (OLYP, M06-L, PBE1PBE, TPSSh) and the indicated basis sets; experimental values in  $\text{CDCl}_3$  for comparison, in redline. For the numbering of H and C atoms, see structures in Figure S1.

|    | Atoms                                  | Expt. | OLYP         |      |              |      |            |      |          |      |                |      |
|----|----------------------------------------|-------|--------------|------|--------------|------|------------|------|----------|------|----------------|------|
|    |                                        |       | aug-cc-p-VDZ |      | aug-cc-p-VTZ |      | def2-TZVPP |      | pcSseg-2 |      | x2c-TZVPPAll-s |      |
|    |                                        |       | GIAO         | CSGT | GIAO         | CSGT | GIAO       | CSGT | GIAO     | CSGT | GIAO           | CSGT |
| 1  | H6 e H9                                | 2.42  | 2.36         | 2.16 | 2.27         | 2.30 | 2.13       | 2.03 | 2.23     | 1.91 | 2.19           | 2.04 |
|    | H2 e H3                                | 2.23  | 2.17         | 1.97 | 2.09         | 2.10 | 1.93       | 1.84 | 2.02     | 1.74 | 1.99           | 1.86 |
|    | H5 e H8                                | 1.37  | 1.28         | 1.09 | 1.18         | 1.20 | 1.00       | 0.91 | 1.10     | 0.80 | 1.04           | 0.91 |
| 2  | H2-H4-H13-H14                          | 1.85  | 1.88         | 1.66 | 1.75         | 1.78 | 1.60       | 1.48 | 1.69     | 1.35 | 1.64           | 1.46 |
| 3  | H12-H13                                | 2.71  | 2.78         | 2.55 | 2.64         | 2.66 | 2.52       | 2.38 | 2.60     | 2.26 | 2.57           | 2.38 |
|    | H11-H14                                | 1.71  | 1.75         | 1.53 | 1.61         | 1.63 | 1.45       | 1.33 | 1.54     | 1.21 | 1.49           | 1.32 |
| 4  | H3-H6-H8                               | 3.11  | 3.11         | 2.89 | 3.03         | 3.04 | 2.92       | 2.81 | 3.01     | 2.69 | 2.99           | 2.83 |
|    | H2-H5-H9                               | 1.53  | 1.50         | 1.32 | 1.41         | 1.44 | 1.25       | 1.16 | 1.34     | 1.05 | 1.27           | 1.15 |
| 5  | H2-H4                                  | 1.40  | 1.12         | 0.86 | 0.98         | 1.02 | 0.79       | 0.83 | 0.933    | 0.67 | 0.93           | 0.83 |
|    | $\text{CH}_3$                          | 1.59  | 1.62         | 1.50 | 1.56         | 1.58 | 1.43       | 1.46 | 1.56     | 1.37 | 1.52           | 1.45 |
| 6  | H14                                    | 3.96  | 3.89         | 3.66 | 3.90         | 3.92 | 3.69       | 3.54 | 3.83     | 3.53 | 3.71           | 3.52 |
|    | H12                                    | 3.46  | 3.42         | 3.20 | 3.43         | 3.43 | 3.22       | 3.10 | 3.37     | 3.09 | 3.24           | 3.08 |
|    | H10                                    | 3.44  | 3.20         | 2.92 | 3.17         | 3.15 | 2.99       | 2.78 | 3.14     | 2.76 | 3.01           | 2.75 |
|    | H15                                    | 2.34  | 2.19         | 1.87 | 2.03         | 2.03 | 1.91       | 1.74 | 1.99     | 1.65 | 1.86           | 1.63 |
|    | H13                                    | 1.92  | 1.76         | 1.50 | 1.63         | 1.65 | 1.52       | 1.39 | 1.61     | 1.30 | 1.50           | 1.32 |
|    | H11                                    | 1.56  | 1.35         | 1.07 | 1.20         | 1.20 | 1.08       | 0.93 | 1.17     | 0.82 | 1.05           | 0.83 |
| 7  | H14                                    | 3.50  | 3.43         | 3.19 | 3.41         | 3.43 | 3.24       | 3.43 | 3.38     | 3.08 | 3.27           | 3.10 |
|    | H10                                    | 3.27  | 3.07         | 2.81 | 3.04         | 3.02 | 2.88       | 3.01 | 3.02     | 2.66 | 2.91           | 2.68 |
|    | H12                                    | 2.99  | 2.95         | 2.74 | 2.95         | 2.94 | 2.77       | 2.97 | 2.91     | 2.62 | 2.79           | 2.64 |
|    | H15                                    | 2.02  | 1.79         | 1.52 | 1.64         | 1.66 | 1.55       | 1.70 | 1.63     | 1.30 | 1.48           | 1.28 |
|    | H13                                    | 1.44  | 1.21         | 0.98 | 1.09         | 1.11 | 0.98       | 1.18 | 1.07     | 0.78 | 0.95           | 0.81 |
|    | H11                                    | 1.29  | 1.01         | 0.76 | 0.87         | 0.89 | 0.76       | 0.93 | 0.85     | 0.53 | 0.71           | 0.54 |
| 8  | H11-H14                                | 3.53  | 3.28         | 3.01 | 3.25         | 3.26 | 3.08       | 2.91 | 3.20     | 2.88 | 3.09           | 2.87 |
|    | H10-H15                                | 2.10  | 1.83         | 1.51 | 1.66         | 1.67 | 1.58       | 1.41 | 1.66     | 1.32 | 1.52           | 1.29 |
|    | H12-H13                                | 1.49  | 1.22         | 0.91 | 1.06         | 1.06 | 0.98       | 0.86 | 1.02     | 0.77 | 0.97           | 0.80 |
| 9  | H3-H5                                  | 2.10  | 1.67         | 1.61 | 1.82         | 1.82 | 1.76       | 1.67 | 1.86     | 1.56 | 1.73           | 1.59 |
|    | H2-H6                                  | 1.64  | 1.18         | 1.09 | 1.28         | 1.27 | 1.26       | 1.11 | 1.34     | 0.98 | 1.21           | 1.00 |
|    | H8-H9                                  | 1.29  | 0.88         | 0.82 | 1.02         | 1.00 | 0.94       | 0.88 | 1.05     | 0.78 | 0.91           | 0.80 |
| 10 | H13                                    | 3.97  | 3.58         | 3.19 | 3.49         | 3.50 | 3.38       | 3.21 | 3.46     | 3.15 | 3.41           | 3.19 |
|    | H12                                    | 2.51  | 2.39         | 1.99 | 2.22         | 2.24 | 2.13       | 2.02 | 2.18     | 1.93 | 2.09           | 1.91 |
|    | H <sub>3</sub> C10                     | 2.12  | 2.35         | 2.19 | 2.31         | 2.34 | 2.25       | 2.08 | 2.32     | 2.00 | 2.28           | 2.10 |
|    | H <sub>3</sub> C11                     | 1.11  | 0.96         | 0.82 | 0.88         | 0.89 | 0.86       | 0.73 | 0.88     | 0.70 | 0.84           | 0.68 |
| 11 | H10, H19                               | 3.76  | 3.27         | 2.88 | 3.17         | 3.19 | 3.07       | 3.00 | 3.12     | 2.83 | 3.09           | 2.86 |
|    | H <sub>3</sub> C11, H <sub>3</sub> C15 | 1.07  | 0.90         | 0.77 | 0.82         | 0.84 | 0.80       | 0.66 | 0.81     | 0.63 | 0.77           | 0.63 |
| 12 | H12, H13                               | 2.61  | 2.53         | 2.12 | 2.37         | 2.38 | 2.28       | 2.17 | 2.32     | 2.11 | 2.25           | 2.08 |
|    | H <sub>3</sub> C10, H <sub>3</sub> C11 | 2.21  | 2.46         | 2.31 | 2.44         | 2.46 | 2.37       | 2.20 | 2.42     | 2.16 | 2.40           | 2.23 |

Table S1, contd.

|    | Atoms                                  | Expt. | M06-L        |      |              |      |            |      |          |      |                |      |
|----|----------------------------------------|-------|--------------|------|--------------|------|------------|------|----------|------|----------------|------|
|    |                                        |       | aug-cc-p-VDZ |      | aug-cc-p-VTZ |      | def2-TZVPP |      | pcSseg-2 |      | x2c-TZVPPAll-s |      |
|    |                                        |       | GIAO         | CSGT | GIAO         | CSGT | GIAO       | CSGT | GIAO     | CSGT | GIAO           | CSGT |
| 1  | H6 e H9                                | 2.42  | 2.18         | 2.51 | 2.09         | 2.63 | 2.02       | 2.47 | 2.02     | 2.25 | 2.02           | 1.92 |
|    | H2 e H3                                | 2.23  | 1.95         | 2.28 | 1.86         | 2.40 | 1.78       | 2.24 | 1.79     | 2.02 | 1.77           | 1.69 |
|    | H5 e H8                                | 1.37  | 1.18         | 1.53 | 1.07         | 1.62 | 0.98       | 1.46 | 1.02     | 1.23 | 0.96           | 0.90 |
| 2  | H2-H4-H13-H14                          | 1.85  | 1.79         | 2.10 | 1.67         | 2.21 | 1.59       | 2.02 | 1.59     | 1.82 | 1.56           | 1.45 |
| 3  | H12-H13                                | 2.71  | 2.46         | 2.85 | 2.38         | 2.96 | 2.35       | 2.78 | 2.40     | 2.60 | 2.37           | 2.21 |
|    | H11-H14                                | 1.71  | 1.56         | 1.92 | 1.41         | 2.01 | 1.36       | 1.83 | 1.41     | 1.63 | 1.39           | 1.24 |
| 4  | H3-H6-H8                               | 3.11  | 2.74         | 3.15 | 2.71         | 3.30 | 2.71       | 3.16 | 2.75     | 2.97 | 2.75           | 2.61 |
|    | H2-H5-H9                               | 1.53  | 1.31         | 1.70 | 1.16         | 1.79 | 1.11       | 1.63 | 1.19     | 1.42 | 1.13           | 1.04 |
| 5  | H2-H4                                  | 1.40  | 1.17         | 1.47 | 1.04         | 1.62 | 1.05       | 1.52 | 1.06     | 1.30 | 1.02           | 0.97 |
|    | CH <sub>3</sub>                        | 1.59  | 1.57         | 1.99 | 1.58         | 2.07 | 1.49       | 1.97 | 1.48     | 1.85 | 1.50           | 1.44 |
| 6  | H14                                    | 3.96  | 3.64         | 3.18 | 3.53         | 4.11 | 3.51       | 3.93 | 3.48     | 3.19 | 3.52           | 3.37 |
|    | H12                                    | 3.46  | 3.16         | 2.71 | 3.10         | 3.64 | 3.05       | 3.49 | 3.04     | 2.78 | 3.06           | 2.93 |
|    | H10                                    | 3.44  | 2.95         | 2.46 | 2.85         | 3.39 | 2.82       | 3.20 | 2.82     | 2.45 | 2.86           | 2.62 |
|    | H15                                    | 2.34  | 1.93         | 1.39 | 1.80         | 2.37 | 1.79       | 2.17 | 1.81     | 1.47 | 1.76           | 1.55 |
|    | H13                                    | 1.92  | 1.50         | 1.01 | 1.44         | 1.98 | 1.39       | 1.81 | 1.43     | 1.11 | 1.38           | 1.22 |
|    | H11                                    | 1.56  | 1.13         | 0.63 | 1.04         | 1.60 | 1.00       | 1.40 | 1.05     | 0.69 | 0.99           | 0.79 |
| 7  | H14                                    | 3.50  | 3.16         | 3.53 | 3.07         | 3.66 | 3.07       | 3.52 | 3.06     | 3.31 | 3.08           | 2.94 |
|    | H10                                    | 3.27  | 2.82         | 3.13 | 2.72         | 3.27 | 2.71       | 3.10 | 2.73     | 2.93 | 2.73           | 2.51 |
|    | H12                                    | 2.99  | 2.69         | 3.06 | 2.63         | 3.19 | 2.60       | 3.06 | 2.63     | 2.87 | 2.61           | 2.50 |
|    | H15                                    | 2.02  | 1.51         | 1.84 | 1.39         | 1.99 | 1.40       | 1.82 | 1.43     | 1.64 | 1.35           | 1.19 |
|    | H13                                    | 1.44  | 0.96         | 1.32 | 0.89         | 1.46 | 0.86       | 1.32 | 0.92     | 1.14 | 0.85           | 0.72 |
|    | H11                                    | 1.29  | 0.79         | 1.14 | 0.70         | 1.28 | 0.66       | 1.10 | 0.74     | 0.93 | 0.65           | 0.49 |
| 8  | H11-H14                                | 3.53  | 3.06         | 2.56 | 2.95         | 3.51 | 2.94       | 3.33 | 2.92     | 3.15 | 2.95           | 2.74 |
|    | H10-H15                                | 2.10  | 1.57         | 1.05 | 1.45         | 2.02 | 1.47       | 1.85 | 1.49     | 1.69 | 1.43           | 1.22 |
|    | H12-H13                                | 1.49  | 0.99         | 0.49 | 0.91         | 1.47 | 0.88       | 1.32 | 0.92     | 1.19 | 0.86           | 0.72 |
| 9  | H3-H5                                  | 2.10  | 1.61         | 1.95 | 1.60         | 2.15 | 1.59       | 2.05 | 1.68     | 1.84 | 1.59           | 1.46 |
|    | H2-H6                                  | 1.64  | 1.14         | 1.46 | 1.12         | 1.66 | 1.13       | 1.53 | 1.24     | 1.40 | 1.11           | 0.92 |
|    | H8-H9                                  | 1.29  | 0.86         | 1.19 | 0.85         | 1.39 | 0.83       | 1.31 | 0.95     | 1.10 | 0.83           | 0.73 |
| 10 | H13                                    | 3.97  | 3.42         | 2.30 | 3.21         | 2.57 | 3.28       | 2.42 | 3.23     | 3.52 | 3.35           | 3.13 |
|    | H12                                    | 2.51  | 2.08         | 3.60 | 1.99         | 3.84 | 1.95       | 3.70 | 1.96     | 2.26 | 1.94           | 1.80 |
|    | H <sub>3</sub> C10                     | 2.12  | 2.30         | 2.71 | 2.22         | 2.80 | 2.24       | 2.61 | 2.23     | 2.45 | 2.30           | 2.09 |
|    | H <sub>3</sub> C11                     | 1.11  | 0.93         | 1.37 | 0.88         | 1.44 | 0.88       | 1.29 | 0.89     | 1.22 | 0.89           | 0.74 |
| 11 | H10, H19                               | 3.76  | 3.15         | 3.33 | 2.99         | 3.57 | 3.02       | 3.43 | 3.00     | 3.23 | 3.10           | 2.90 |
|    | H <sub>3</sub> C11, H <sub>3</sub> C15 | 1.07  | 0.87         | 1.32 | 0.84         | 1.39 | 0.83       | 1.22 | 0.83     | 1.14 | 0.88           | 0.75 |
| 12 | H12, H13                               | 2.61  | 2.15         | 2.41 | 2.13         | 2.69 | 2.10       | 2.56 | 2.12     | 2.41 | 2.15           | 2.03 |
|    | H <sub>3</sub> C10, H <sub>3</sub> C11 | 2.21  | 2.42         | 2.82 | 2.35         | 2.89 | 2.34       | 2.71 | 2.32     | 2.57 | 2.42           | 2.24 |

Table S1, contd.

|    | Atoms                                  | Expt. | PBE1PBE      |      |              |      |            |      |          |      |                |      |
|----|----------------------------------------|-------|--------------|------|--------------|------|------------|------|----------|------|----------------|------|
|    |                                        |       | aug-cc-p-VDZ |      | aug-cc-p-VTZ |      | def2-TZVPP |      | pcSseg-2 |      | x2c-TZVPPAll-s |      |
|    |                                        |       | GIAO         | CSGT | GIAO         | CSGT | GIAO       | CSGT | GIAO     | CSGT | GIAO           | CSGT |
| 1  | H6 e H9                                | 2.42  | 2.42         | 2.23 | 2.22         | 2.34 | 2.13       | 2.02 | 2.20     | 1.87 | 2.16           | 2.01 |
|    | H2 e H3                                | 2.23  | 2.14         | 1.95 | 1.94         | 2.05 | 1.83       | 1.74 | 1.91     | 1.60 | 1.86           | 1.73 |
|    | H5 e H8                                | 1.37  | 1.27         | 1.09 | 1.05         | 1.17 | 0.93       | 0.84 | 1.01     | 0.69 | 0.95           | 0.82 |
| 2  | H2-H4-H13-H14                          | 1.85  | 1.93         | 1.64 | 1.68         | 1.81 | 1.58       | 1.46 | 1.66     | 1.30 | 1.60           | 1.43 |
| 3  | H12-H13                                | 2.71  | 2.79         | 2.49 | 2.54         | 2.66 | 2.47       | 2.33 | 2.52     | 2.17 | 2.49           | 2.31 |
|    | H11-H14                                | 1.71  | 1.69         | 1.40 | 1.43         | 1.56 | 1.33       | 1.21 | 1.40     | 1.05 | 1.34           | 1.18 |
| 4  | H3-H6-H8                               | 3.11  | 3.18         | 2.89 | 2.99         | 3.09 | 2.92       | 2.82 | 2.98     | 2.65 | 2.96           | 2.80 |
|    | H2-H5-H9                               | 1.53  | 1.38         | 1.12 | 1.16         | 1.29 | 1.04       | 0.97 | 1.13     | 0.81 | 1.04           | 0.94 |
| 5  | H2-H4                                  | 1.40  | 1.25         | 0.91 | 1.00         | 1.13 | 0.91       | 0.86 | 0.97     | 0.68 | 0.95           | 0.85 |
|    | CH <sub>3</sub>                        | 1.59  | 1.69         | 1.47 | 1.52         | 1.63 | 1.49       | 1.42 | 1.54     | 1.32 | 1.49           | 1.42 |
| 6  | H14                                    | 3.96  | 3.76         | 3.44 | 3.61         | 3.72 | 3.47       | 3.31 | 3.55     | 3.23 | 3.47           | 3.27 |
|    | H12                                    | 3.46  | 3.33         | 3.03 | 3.20         | 3.29 | 3.06       | 2.93 | 3.15     | 2.85 | 3.06           | 2.89 |
|    | H10                                    | 3.44  | 3.17         | 2.81 | 2.99         | 3.07 | 2.88       | 2.67 | 2.96     | 2.58 | 2.88           | 2.62 |
|    | H15                                    | 2.34  | 2.17         | 1.78 | 1.91         | 2.01 | 1.83       | 1.65 | 1.89     | 1.52 | 1.78           | 1.54 |
|    | H13                                    | 1.92  | 1.74         | 1.41 | 1.52         | 1.63 | 1.44       | 1.30 | 1.52     | 1.17 | 1.41           | 1.22 |
|    | H11                                    | 1.56  | 1.42         | 1.05 | 1.17         | 1.27 | 1.08       | 0.91 | 1.16     | 0.77 | 1.04           | 0.82 |
| 7  | H14                                    | 3.50  | 3.35         | 3.04 | 3.19         | 3.30 | 3.09       | 2.96 | 3.18     | 2.84 | 3.09           | 2.91 |
|    | H10                                    | 3.27  | 3.08         | 2.74 | 2.91         | 2.98 | 2.81       | 2.63 | 2.89     | 2.52 | 2.81           | 2.58 |
|    | H12                                    | 2.99  | 2.92         | 2.63 | 2.78         | 2.87 | 2.67       | 2.56 | 2.76     | 2.45 | 2.67           | 2.52 |
|    | H15                                    | 2.02  | 1.72         | 1.38 | 1.47         | 1.59 | 1.41       | 1.26 | 1.48     | 1.13 | 1.34           | 1.14 |
|    | H13                                    | 1.44  | 1.17         | 0.86 | 0.95         | 1.06 | 0.88       | 0.77 | 0.96     | 0.63 | 0.83           | 0.69 |
|    | H11                                    | 1.29  | 1.00         | 0.68 | 0.77         | 0.88 | 0.68       | 0.55 | 0.77     | 0.40 | 0.63           | 0.45 |
| 8  | H11-H14                                | 3.53  | 3.17         | 2.82 | 3.00         | 3.10 | 2.89       | 2.71 | 2.96     | 2.61 | 2.88           | 2.65 |
|    | H10-H15                                | 2.10  | 1.84         | 1.44 | 1.57         | 1.67 | 1.52       | 1.34 | 1.58     | 1.21 | 1.46           | 1.22 |
|    | H12-H13                                | 1.49  | 1.19         | 0.81 | 0.95         | 1.04 | 0.87       | 0.76 | 0.92     | 0.64 | 0.86           | 0.68 |
| 9  | H3-H5                                  | 2.10  | 1.74         | 1.43 | 1.90         | 1.69 | 1.55       | 1.45 | 1.64     | 1.30 | 1.52           | 1.37 |
|    | H2-H6                                  | 1.64  | 1.34         | 0.99 | 1.46         | 1.23 | 1.15       | 0.98 | 1.21     | 0.83 | 1.09           | 0.87 |
|    | H8-H9                                  | 1.29  | 1.04         | 0.71 | 1.19         | 0.96 | 0.83       | 0.76 | 0.93     | 0.62 | 0.80           | 0.68 |
| 10 | H13                                    | 3.97  | 3.57         | 3.18 | 3.34         | 3.46 | 3.26       | 3.09 | 3.29     | 2.98 | 3.28           | 3.04 |
|    | H12                                    | 2.51  | 2.42         | 2.03 | 2.16         | 2.27 | 2.08       | 1.97 | 2.11     | 1.84 | 2.04           | 1.86 |
|    | H <sub>3</sub> C10                     | 2.12  | 2.43         | 2.26 | 2.28         | 2.39 | 2.23       | 2.04 | 2.28     | 1.94 | 2.26           | 2.05 |
|    | H <sub>3</sub> C11                     | 1.11  | 1.04         | 0.90 | 0.87         | 0.97 | 0.85       | 0.70 | 0.87     | 0.67 | 0.83           | 0.68 |
| 11 | H10, H19                               | 3.76  | 3.27         | 2.80 | 3.35         | 3.15 | 2.96       | 2.78 | 2.98     | 2.68 | 2.96           | 2.72 |
|    | H <sub>3</sub> C11, H <sub>3</sub> C15 | 1.07  | 0.98         | 0.76 | 1.11         | 0.91 | 0.79       | 0.63 | 0.80     | 0.59 | 0.76           | 0.60 |
| 12 | H12, H13                               | 2.61  | 2.56         | 2.07 | 2.29         | 2.41 | 2.22       | 2.12 | 2.25     | 2.03 | 2.20           | 2.02 |
|    | H <sub>3</sub> C10, H <sub>3</sub> C11 | 2.21  | 2.54         | 2.25 | 2.39         | 2.51 | 2.34       | 2.16 | 2.38     | 2.09 | 2.37           | 2.18 |

Table S1, contd.

|    | Atoms                                  | Expt. | TPSSh        |      |              |      |            |      |          |      |                |      |
|----|----------------------------------------|-------|--------------|------|--------------|------|------------|------|----------|------|----------------|------|
|    |                                        |       | aug-cc-p-VDZ |      | aug-cc-p-VTZ |      | def2-TZVPP |      | pcSseg-2 |      | x2c-TZVPPAll-s |      |
|    |                                        |       | GIAO         | CSGT | GIAO         | CSGT | GIAO       | CSGT | GIAO     | CSGT | GIAO           | CSGT |
| 1  | H6 e H9                                | 2.42  | 2.38         | 2.18 | 2.28         | 2.31 | 2.18       | 2.08 | 2.26     | 1.94 | 2.20           | 2.06 |
|    | H2 e H3                                | 2.23  | 2.14         | 1.95 | 2.05         | 2.07 | 1.93       | 1.85 | 2.01     | 1.72 | 1.96           | 1.84 |
|    | H5 e H8                                | 1.37  | 1.28         | 1.08 | 1.16         | 1.19 | 1.03       | 0.95 | 1.12     | 0.81 | 1.04           | 0.93 |
| 2  | H2-H4-H13-H14                          | 1.85  | 1.90         | 1.69 | 1.76         | 1.80 | 1.65       | 1.54 | 1.73     | 1.39 | 1.67           | 1.50 |
| 3  | H12-H13                                | 2.71  | 2.77         | 2.55 | 2.63         | 2.65 | 2.53       | 2.41 | 2.60     | 2.27 | 2.56           | 2.38 |
|    | H11-H14                                | 1.71  | 1.72         | 1.50 | 1.56         | 1.60 | 1.45       | 1.34 | 1.53     | 1.19 | 1.46           | 1.31 |
| 4  | H3-H6-H8                               | 3.11  | 3.12         | 2.90 | 3.02         | 3.04 | 2.94       | 2.85 | 3.02     | 2.70 | 2.98           | 2.83 |
|    | H2-H5-H9                               | 1.53  | 1.44         | 1.25 | 1.33         | 1.36 | 1.19       | 1.13 | 1.29     | 0.98 | 1.19           | 1.09 |
| 5  | H2-H4                                  | 1.40  | 1.26         | 0.99 | 1.12         | 1.17 | 1.03       | 0.98 | 1.08     | 0.82 | 1.06           | 0.96 |
|    | CH <sub>3</sub>                        | 1.59  | 1.64         | 1.52 | 1.57         | 1.59 | 1.53       | 1.47 | 1.58     | 1.37 | 1.31           | 1.46 |
| 6  | H14                                    | 3.96  | 3.78         | 3.54 | 3.73         | 3.75 | 3.58       | 3.44 | 3.67     | 3.37 | 3.58           | 3.39 |
|    | H12                                    | 3.46  | 3.33         | 3.10 | 3.29         | 3.30 | 3.14       | 3.03 | 3.25     | 2.97 | 3.15           | 2.99 |
|    | H10                                    | 3.44  | 3.13         | 2.85 | 3.07         | 3.06 | 2.94       | 2.74 | 3.03     | 2.67 | 2.94           | 2.69 |
|    | H15                                    | 2.34  | 2.18         | 1.87 | 2.01         | 2.02 | 1.92       | 1.75 | 1.98     | 1.63 | 1.86           | 1.64 |
|    | H13                                    | 1.92  | 1.64         | 1.48 | 1.61         | 1.63 | 1.52       | 1.40 | 1.60     | 1.27 | 1.49           | 1.32 |
|    | H11                                    | 1.56  | 1.38         | 1.10 | 1.23         | 1.24 | 1.13       | 0.98 | 1.21     | 0.84 | 1.09           | 0.88 |
| 7  | H14                                    | 3.50  | 3.34         | 3.11 | 3.28         | 3.30 | 3.16       | 3.05 | 3.27     | 2.95 | 3.17           | 3.00 |
|    | H10                                    | 3.27  | 3.02         | 2.76 | 2.95         | 2.95 | 2.84       | 2.68 | 2.94     | 2.58 | 2.85           | 2.62 |
|    | H12                                    | 2.99  | 2.88         | 2.67 | 2.84         | 2.84 | 2.72       | 2.63 | 2.83     | 2.52 | 2.72           | 2.58 |
|    | H15                                    | 2.02  | 1.75         | 1.49 | 1.60         | 1.62 | 1.53       | 1.39 | 1.59     | 1.26 | 1.45           | 1.26 |
|    | H13                                    | 1.44  | 1.19         | 0.96 | 1.07         | 1.09 | 0.98       | 0.89 | 1.07     | 0.76 | 0.94           | 0.80 |
|    | H11                                    | 1.29  | 1.00         | 0.76 | 0.87         | 0.89 | 0.77       | 0.65 | 0.86     | 0.52 | 0.72           | 0.55 |
| 8  | H11-H14                                | 3.53  | 3.18         | 2.91 | 3.11         | 3.13 | 2.99       | 2.82 | 3.08     | 2.74 | 2.98           | 2.77 |
|    | H10-H15                                | 2.10  | 1.83         | 1.52 | 1.66         | 1.67 | 1.59       | 1.43 | 1.66     | 1.31 | 1.53           | 1.31 |
|    | H12-H13                                | 1.49  | 1.23         | 0.93 | 1.08         | 1.09 | 1.00       | 0.89 | 1.05     | 0.78 | 0.98           | 0.82 |
| 9  | H3-H5                                  | 2.10  | 1.81         | 1.57 | 1.75         | 1.76 | 1.69       | 1.61 | 1.79     | 1.46 | 1.67           | 1.52 |
|    | H2-H6                                  | 1.64  | 1.37         | 1.10 | 1.28         | 1.27 | 1.26       | 1.10 | 1.33     | 0.96 | 1.21           | 0.99 |
|    | H8-H9                                  | 1.29  | 1.06         | 0.81 | 0.99         | 0.99 | 0.93       | 0.87 | 1.04     | 0.75 | 0.90           | 0.80 |
| 10 | H13                                    | 3.97  | 3.57         | 3.17 | 3.45         | 3.47 | 3.36       | 3.20 | 3.40     | 3.10 | 3.37           | 3.15 |
|    | H12                                    | 2.51  | 2.41         | 2.01 | 2.25         | 2.28 | 2.17       | 2.06 | 2.19     | 1.95 | 2.12           | 1.95 |
|    | C10H <sub>3</sub>                      | 2.12  | 2.38         | 2.22 | 2.33         | 2.35 | 2.27       | 2.09 | 2.32     | 2.00 | 2.30           | 2.11 |
|    | C11H <sub>3</sub>                      | 1.11  | 1.00         | 1.30 | 0.92         | 0.94 | 0.90       | 0.76 | 0.92     | 0.73 | 0.88           | 0.74 |
| 11 | H10, H19                               | 3.76  | 3.28         | 2.89 | 3.16         | 3.18 | 3.07       | 2.91 | 3.10     | 2.82 | 3.07           | 2.84 |
|    | H <sub>3</sub> C11, H <sub>3</sub> C15 | 1.07  | 0.95         | 0.82 | 0.87         | 0.88 | 0.85       | 0.70 | 0.86     | 0.66 | 0.82           | 0.67 |
| 12 | H12, H13                               | 2.61  | 2.54         | 2.13 | 2.38         | 2.40 | 2.30       | 2.20 | 2.34     | 2.13 | 2.26           | 2.10 |
|    | H <sub>3</sub> C10, H <sub>3</sub> C11 | 2.21  | 2.49         | 2.32 | 2.44         | 2.49 | 2.38       | 2.21 | 2.42     | 2.15 | 2.41           | 2.22 |

**Table S2.** Calculated  $^{13}\text{C}$ -NMR chemical shifts of polyarsenicals **1-12** in chloroform by using combinations of methods (GIAO, CSGT), functionals (OLYP, M06-L, PBE1PBE, TPSSh) and the indicated basis sets; experimental values in  $\text{CDCl}_3$  for comparison, in redline. For the numbering of H and C atoms, see structures in Figure S1.

|    | Atoms           | Expt. | OLYP         |       |              |       |            |       |          |       |                |       |
|----|-----------------|-------|--------------|-------|--------------|-------|------------|-------|----------|-------|----------------|-------|
|    |                 |       | aug-cc-p-VDZ |       | aug-cc-p-VTZ |       | def2-TZVPP |       | pcSseg-2 |       | x2c-TZVPPAll-s |       |
|    |                 |       | GIAO         | CSGT  | GIAO         | CSGT  | GIAO       | CSGT  | GIAO     | CSGT  | GIAO           | CSGT  |
| 1  | C4 e C7         | 23.05 | 28.32        | 25.98 | 27.26        | 26.74 | 25.50      | 22.65 | 27.16    | 26.46 | 25.55          | 24.88 |
|    | C1              | 17.03 | 26.44        | 23.79 | 24.82        | 24.24 | 23.15      | 20.74 | 24.51    | 24.02 | 23.00          | 22.54 |
| 2  | C1-C3           | 30.60 | 33.62        | 31.73 | 33.34        | 32.74 | 31.72      | 28.40 | 33.50    | 32.57 | 31.79          | 30.87 |
| 3  | C1-C3           | 23.71 | 30.36        | 28.51 | 29.61        | 29.21 | 28.10      | 25.26 | 29.80    | 29.01 | 28.16          | 27.33 |
| 4  | C1-C4-C7        | 17.82 | 27.41        | 24.83 | 25.88        | 28.91 | 24.43      | 21.95 | 26.08    | 25.39 | 24.52          | 23.84 |
| 5  | C1-C3           | 32.32 | 36.07        | 33.75 | 34.97        | 34.80 | 34.63      | 31.72 | 35.74    | 35.10 | 34.23          | 33.83 |
|    | CH <sub>3</sub> | 10.29 | 11.46        | 13.39 | 12.35        | 13.04 | 11.71      | 11.47 | 12.61    | 12.38 | 12.83          | 12.49 |
| 6  | C9              | 42.20 | 53.47        | 50.39 | 52.28        | 52.01 | 51.38      | 48.72 | 53.79    | 53.20 | 50.86          | 49.91 |
|    | C7              | 27.40 | 39.60        | 36.79 | 38.15        | 37.79 | 37.06      | 34.64 | 38.99    | 38.50 | 36.49          | 35.81 |
|    | C2              | 25.70 | 37.12        | 34.28 | 35.55        | 35.07 | 34.15      | 31.52 | 36.09    | 35.61 | 33.39          | 32.51 |
| 7  | C9              | 45.14 | 53.10        | 50.26 | 52.25        | 52.00 | 51.34      | 48.61 | 53.86    | 53.27 | 50.99          | 50.18 |
|    | C2              | 33.58 | 42.46        | 39.89 | 41.60        | 41.21 | 40.30      | 37.62 | 42.60    | 42.05 | 39.86          | 39.08 |
|    | C7              | 31.40 | 40.61        | 37.87 | 39.48        | 39.14 | 38.49      | 36.00 | 40.48    | 39.93 | 38.06          | 37.46 |
| 8  | C2-C9           | 38.90 | 49.26        | 46.35 | 48.03        | 47.75 | 46.89      | 47.96 | 49.34    | 48.70 | 46.35          | 45.39 |
|    | C8              | 8.10  | 19.76        | 16.83 | 16.71        | 16.43 | 15.91      | 17.71 | 16.75    | 16.53 | 15.11          | 14.44 |
| 9  | C1-C4           | 45.3  | 53.60        | 53.90 | 52.69        | 52.48 | 52.46      | 49.93 | 54.85    | 54.30 | 52.05          | 51.21 |
|    | C7              | 32.5  | 42.57        | 42.95 | 41.43        | 41.17 | 41.14      | 38.82 | 43.06    | 42.66 | 40.61          | 40.06 |
| 10 | C7              | 48.8  | 57.40        | 59.07 | 56.56        | 56.18 | 56.56      | 54.08 | 58.43    | 58.14 | 55.42          | 54.85 |
|    | C1              | 43.0  | 53.43        | 54.78 | 52.40        | 51.90 | 52.34      | 49.94 | 53.87    | 53.71 | 51.14          | 50.70 |
|    | C11             | 20.0  | 18.96        | 25.87 | 20.60        | 21.57 | 20.22      | 19.90 | 21.60    | 21.27 | 21.71          | 21.18 |
|    | C10             | 13.3  | 12.58        | 19.38 | 13.84        | 14.88 | 13.74      | 13.56 | 14.57    | 14.16 | 14.88          | 14.39 |
| 11 | C1, C7          | 48.8  | 57.08        | 54.11 | 56.21        | 55.75 | 56.23      | 53.77 | 57.88    | 57.79 | 54.99          | 54.48 |
|    | C11, C15        | 19.8  | 18.68        | 21.08 | 20.35        | 21.37 | 20.00      | 19.69 | 21.48    | 21.18 | 21.47          | 20.96 |
| 12 | C1, C7          | 42.5  | 53.17        | 49.88 | 52.12        | 51.61 | 51.97      | 49.58 | 53.40    | 53.44 | 50.86          | 50.39 |
|    | C10, C11        | 12.9  | 12.55        | 14.68 | 13.82        | 14.76 | 13.66      | 13.53 | 14.63    | 14.33 | 14.76          | 14.32 |

Table S2, contd.

|    | Atoms           | Expt. | M06-L        |       |              |       |            |       |          |       |                |       |
|----|-----------------|-------|--------------|-------|--------------|-------|------------|-------|----------|-------|----------------|-------|
|    |                 |       | aug-cc-p-VDZ |       | aug-cc-p-VTZ |       | def2-TZVPP |       | pcSseg-2 |       | x2c-TZVPPAll-s |       |
|    |                 |       | GIAO         | CSGT  | GIAO         | CSGT  | GIAO       | CSGT  | GIAO     | CSGT  | GIAO           | CSGT  |
| 1  | C4 e C7         | 23.05 | 23.50        | 22.58 | 19.93        | 21.81 | 20.57      | 19.59 | 20.75    | 21.26 | 19.04          | 18.91 |
|    | C1              | 17.03 | 21.58        | 20.60 | 17.62        | 19.37 | 18.11      | 17.57 | 18.12    | 18.81 | 16.40          | 16.41 |
| 2  | C1-C3           | 30.60 | 28.24        | 27.68 | 25.51        | 27.23 | 26.30      | 24.79 | 24.50    | 31.07 | 24.60          | 24.35 |
| 3  | C1-C3           | 23.71 | 25.46        | 24.71 | 19.11        | 23.83 | 22.53      | 20.71 | 23.15    | 23.83 | 21.43          | 20.84 |
| 4  | C1-C4-C7        | 17.82 | 23.72        | 21.87 | 16.96        | 20.87 | 19.37      | 19.11 | 19.98    | 20.73 | 18.46          | 17.99 |
| 5  | C1-C3           | 32.32 | 33.40        | 32.42 | 28.93        | 31.51 | 31.11      | 30.30 | 31.69    | 32.44 | 29.54          | 29.88 |
|    | CH <sub>3</sub> | 10.29 | 14.81        | 17.54 | 16.26        | 16.71 | 14.32      | 16.23 | 14.66    | 16.76 | 14.41          | 14.93 |
| 6  | C9              | 42.20 | 49.03        | 47.13 | 43.20        | 45.99 | 45.65      | 45.25 | 46.48    | 44.54 | 43.66          | 43.34 |
|    | C7              | 27.40 | 36.08        | 34.31 | 30.15        | 32.83 | 32.17      | 31.88 | 32.92    | 31.34 | 30.31          | 29.92 |
|    | C2              | 25.70 | 33.26        | 31.91 | 27.01        | 30.29 | 39.39      | 29.04 | 30.16    | 28.73 | 27.56          | 27.00 |
| 7  | C9              | 45.14 | 47.69        | 46.18 | 42.37        | 45.34 | 44.97      | 44.41 | 45.99    | 47.03 | 43.13          | 42.83 |
|    | C2              | 33.58 | 37.58        | 36.36 | 31.69        | 35.27 | 34.44      | 34.00 | 35.46    | 36.40 | 32.90          | 32.37 |
|    | C7              | 31.40 | 35.81        | 34.49 | 30.30        | 33.48 | 32.75      | 32.37 | 33.75    | 34.64 | 31.12          | 30.68 |
| 8  | C2-C9           | 38.90 | 45.01        | 43.13 | 38.86        | 41.89 | 41.51      | 41.00 | 42.26    | 43.20 | 39.62          | 39.09 |
|    | C8              | 8.10  | 16.69        | 14.66 | 10.24        | 12.53 | 11.43      | 11.37 | 11.51    | 12.46 | 9.62           | 9.27  |
| 9  | C1-C4           | 45.3  | 49.59        | 47.7  | 44.70        | 46.9  | 46.96      | 46.6  | 48.17    | 49.2  | 45.07          | 44.61 |
|    | C7              | 32.5  | 39.04        | 37.3  | 34.11        | 36.3  | 36.18      | 36.0  | 37.32    | 38.1  | 34.34          | 33.96 |
| 10 | C7              | 48.8  | 54.78        | 52.67 | 48.33        | 51.46 | 51.56      | 51.82 | 52.99    | 53.98 | 49.81          | 49.70 |
|    | C1              | 43.0  | 51.37        | 49.55 | 45.36        | 48.18 | 48.34      | 48.64 | 49.49    | 50.77 | 46.14          | 46.42 |
|    | C11             | 20.0  | 22.45        | 24.79 | 21.36        | 24.26 | 22.38      | 23.95 | 22.59    | 24.63 | 22.44          | 22.93 |
|    | C10             | 13.3  | 17.27        | 19.24 | 13.45        | 18.62 | 16.46      | 18.37 | 16.92    | 18.71 | 16.85          | 16.95 |
| 11 | C1, C7          | 48.8  | 51.96        | 52.48 | 48.11        | 51.30 | 51.50      | 51.68 | 53.09    | 53.81 | 54.00          | 54.04 |
|    | C11, C15        | 19.8  | 20.28        | 24.64 | 22.36        | 24.08 | 22.08      | 23.76 | 22.93    | 24.41 | 25.14          | 25.76 |
| 12 | C1, C7          | 42.5  | 51.77        | 49.13 | 45.91        | 47.71 | 48.32      | 48.12 | 49.24    | 50.29 | 49.89          | 50.27 |
|    | C10, C11        | 12.9  | 16.72        | 19.17 | 15.31        | 18.52 | 16.23      | 18.32 | 17.36    | 18.64 | 19.80          | 19.99 |

Table S2, contd.

|    | Atoms           | Expt. | PBE1PBE      |       |              |       |            |       |          |       |                |       |
|----|-----------------|-------|--------------|-------|--------------|-------|------------|-------|----------|-------|----------------|-------|
|    |                 |       | aug-cc-p-VDZ |       | aug-cc-p-VTZ |       | def2-TZVPP |       | pcSseg-2 |       | x2c-TZVPPAll-s |       |
|    |                 |       | GIAO         | CSGT  | GIAO         | CSGT  | GIAO       | CSGT  | GIAO     | CSGT  | GIAO           | CSGT  |
| 1  | C4 e C7         | 23.05 | 28.13        | 25.80 | 26.25        | 26.39 | 25.58      | 22.52 | 26.23    | 25.39 | 24.87          | 24.45 |
|    | C1              | 17.03 | 25.12        | 22.52 | 22.68        | 22.78 | 21.96      | 19.37 | 22.41    | 21.77 | 21.06          | 20.85 |
| 2  | C1-C3           | 30.60 | 34.34        | 32.36 | 33.14        | 33.21 | 32.72      | 29.15 | 32.61    | 32.32 | 31.98          | 31.33 |
| 3  | C1-C3           | 23.71 | 29.98        | 28.03 | 28.36        | 28.57 | 27.91      | 26.99 | 28.51    | 27.59 | 27.14          | 26.57 |
| 4  | C1-C4-C7        | 17.82 | 26.46        | 23.73 | 24.01        | 24.29 | 23.43      | 20.81 | 24.07    | 23.29 | 22.74          | 22.35 |
| 5  | C1-C3           | 32.32 | 36.84        | 34.38 | 34.97        | 35.34 | 35.05      | 32.21 | 35.58    | 34.78 | 34.18          | 34.15 |
|    | CH <sub>3</sub> | 10.29 | 10.76        | 12.63 | 11.23        | 12.41 | 10.58      | 10.43 | 11.20    | 11.11 | 11.21          | 11.38 |
| 6  | C9              | 42.20 | 52.19        | 49.10 | 50.17        | 50.51 | 50.01      | 47.23 | 51.31    | 50.51 | 48.78          | 48.15 |
|    | C7              | 27.40 | 38.27        | 35.49 | 36.06        | 36.27 | 35.69      | 33.13 | 36.71    | 36.02 | 34.41          | 33.97 |
|    | C2              | 25.70 | 36.55        | 33.72 | 34.28        | 34.36 | 33.64      | 30.84 | 34.69    | 33.95 | 32.21          | 31.50 |
| 7  | C9              | 45.14 | 52.10        | 49.24 | 50.47        | 50.80 | 50.34      | 48.87 | 51.73    | 50.97 | 49.33          | 48.80 |
|    | C2              | 33.58 | 43.13        | 39.55 | 40.53        | 40.71 | 40.06      | 38.59 | 41.35    | 40.59 | 38.99          | 38.38 |
|    | C7              | 31.40 | 39.53        | 36.83 | 37.64        | 37.90 | 37.42      | 36.19 | 38.48    | 37.79 | 36.33          | 35.97 |
| 8  | C2-C9           | 38.90 | 48.16        | 45.25 | 46.18        | 46.47 | 45.82      | 42.96 | 47.13    | 46.28 | 44.60          | 43.89 |
|    | C8              | 8.10  | 17.97        | 15.05 | 14.26        | 14.51 | 13.94      | 11.74 | 14.08    | 13.73 | 12.41          | 11.99 |
| 9  | C1-C4           | 45.3  | 53.38        | 50.29 | 51.77        | 52.11 | 52.00      | 49.40 | 53.52    | 52.78 | 51.06          | 50.47 |
|    | C7              | 32.5  | 41.93        | 38.94 | 40.03        | 40.36 | 40.27      | 37.93 | 41.44    | 40.89 | 39.17          | 38.89 |
| 10 | C7              | 48.8  | 57.01        | 53.94 | 55.44        | 55.62 | 55.59      | 53.26 | 56.75    | 56.21 | 54.10          | 53.80 |
|    | C1              | 43.0  | 52.30        | 48.94 | 50.42        | 50.49 | 50.56      | 48.44 | 51.40    | 51.29 | 48.91          | 48.91 |
|    | C11             | 20.0  | 19.28        | 21.41 | 20.45        | 21.87 | 20.14      | 19.90 | 21.00    | 20.92 | 21.10          | 21.20 |
|    | C10             | 13.3  | 12.41        | 14.43 | 13.17        | 14.61 | 12.93      | 12.80 | 13.44    | 13.19 | 13.56          | 13.59 |
| 11 | C1, C7          | 48.8  | 56.71        | 53.63 | 55.18        | 55.28 | 55.31      | 53.03 | 56.31    | 56.10 | 53.73          | 53.51 |
|    | C11, C15        | 19.8  | 19.05        | 21.24 | 20.23        | 21.70 | 19.95      | 19.71 | 20.93    | 20.93 | 20.89          | 20.99 |
| 12 | C1, C7          | 42.5  | 51.95        | 48.54 | 50.03        | 50.09 | 50.10      | 47.97 | 50.86    | 51.06 | 48.51          | 48.48 |
|    | C10, C11        | 12.9  | 12.37        | 14.29 | 13.07        | 14.46 | 12.81      | 12.73 | 13.48    | 13.41 | 13.41          | 13.48 |



Table S2, contd.

|    | Atoms           | Expt. | TPSSh        |       |              |       |            |       |          |       |                |       |
|----|-----------------|-------|--------------|-------|--------------|-------|------------|-------|----------|-------|----------------|-------|
|    |                 |       | aug-cc-p-VDZ |       | aug-cc-p-VTZ |       | def2-TZVPP |       | pcSseg-2 |       | x2c-TZVPPAll-s |       |
|    |                 |       | GIAO         | CSGT  | GIAO         | CSGT  | GIAO       | CSGT  | GIAO     | CSGT  | GIAO           | CSGT  |
| 1  | C4 e C7         | 23.05 | 26.72        | 24.46 | 25.42        | 24.93 | 24.72      | 21.74 | 25.42    | 24.61 | 23.97          | 23.53 |
|    | C1              | 17.03 | 24.26        | 21.72 | 22.44        | 21.88 | 21.74      | 19.21 | 22.21    | 21.60 | 20.79          | 20.53 |
| 2  | C1-C3           | 30.60 | 32.50        | 30.59 | 31.85        | 31.30 | 31.36      | 27.87 | 32.11    | 31.07 | 30.57          | 29.91 |
| 3  | C1-C3           | 23.71 | 28.63        | 26.80 | 27.60        | 27.22 | 27.14      | 24.17 | 27.82    | 26.95 | 26.33          | 25.76 |
| 4  | C1-C4-C7        | 17.82 | 25.50        | 22.84 | 23.55        | 23.31 | 23.11      | 20.53 | 23.78    | 23.02 | 22.36          | 21.93 |
| 5  | C1-C3           | 32.32 | 35.73        | 33.56 | 34.52        | 34.35 | 34.66      | 31.91 | 35.28    | 34.50 | 33.66          | 33.58 |
|    | CH <sub>3</sub> | 10.29 | 11.68        | 13.60 | 12.89        | 13.45 | 12.28      | 12.14 | 12.90    | 12.81 | 12.95          | 13.06 |
| 6  | C9              | 42.20 | 52.04        | 49.05 | 50.55        | 50.29 | 50.48      | 47.80 | 51.90    | 51.15 | 49.20          | 48.58 |
|    | C7              | 27.40 | 37.93        | 35.25 | 36.32        | 35.92 | 36.03      | 33.57 | 37.11    | 36.49 | 34.73          | 34.27 |
|    | C2              | 25.70 | 35.70        | 33.02 | 34.06        | 33.55 | 33.50      | 30.84 | 34.59    | 33.96 | 32.04          | 31.36 |
| 7  | C9              | 45.14 | 51.63        | 48.89 | 50.53        | 50.26 | 50.46      | 47.68 | 51.97    | 51.25 | 49.39          | 48.85 |
|    | C2              | 33.58 | 41.01        | 38.58 | 40.01        | 39.59 | 39.58      | 36.84 | 40.95    | 40.27 | 38.46          | 37.86 |
|    | C7              | 31.40 | 38.85        | 36.27 | 37.57        | 37.31 | 37.40      | 34.85 | 38.53    | 37.88 | 36.27          | 35.86 |
| 8  | C2-C9           | 38.90 | 47.84        | 45.04 | 46.37        | 46.08 | 46.10      | 43.36 | 47.53    | 46.75 | 44.85          | 44.15 |
|    | C8              | 8.10  | 17.66        | 14.83 | 14.59        | 14.29 | 14.42      | 12.33 | 14.58    | 14.26 | 12.92          | 12.46 |
| 9  | C1-C4           | 45.3  | 53.05        | 50.16 | 52.01        | 51.79 | 52.32      | 49.81 | 53.96    | 53.27 | 51.31          | 50.70 |
|    | C7              | 32.5  | 41.52        | 38.73 | 40.27        | 40.03 | 40.61      | 38.30 | 41.86    | 41.33 | 39.44          | 39.10 |
| 10 | C7              | 48.8  | 56.20        | 54.02 | 55.76        | 55.42 | 56.11      | 53.91 | 57.38    | 56.90 | 54.41          | 54.10 |
|    | C1              | 43.0  | 52.01        | 49.46 | 51.31        | 50.83 | 51.64      | 49.60 | 52.59    | 52.48 | 49.77          | 49.73 |
|    | C11             | 20.0  | 18.98        | 21.84 | 21.40        | 22.33 | 21.24      | 21.02 | 22.14    | 22.04 | 22.22          | 22.26 |
|    | C10             | 13.3  | 12.51        | 15.28 | 14.61        | 15.55 | 14.53      | 14.43 | 15.03    | 14.80 | 15.22          | 15.22 |
| 11 | C1, C7          | 48.8  | 56.61        | 53.78 | 55.59        | 55.13 | 55.90      | 53.73 | 57.19    | 56.99 | 54.10          | 53.87 |
|    | C11, C15        | 19.8  | 19.39        | 21.67 | 21.24        | 22.16 | 21.06      | 20.84 | 22.25    | 22.20 | 22.02          | 22.06 |
| 12 | C1, C7          | 42.5  | 52.23        | 48.99 | 50.92        | 50.38 | 51.12      | 49.08 | 52.18    | 52.33 | 49.33          | 49.25 |
|    | C10, C11        | 12.9  | 13.10        | 15.13 | 14.55        | 15.41 | 14.42      | 14.37 | 15.26    | 15.16 | 15.07          | 15.10 |

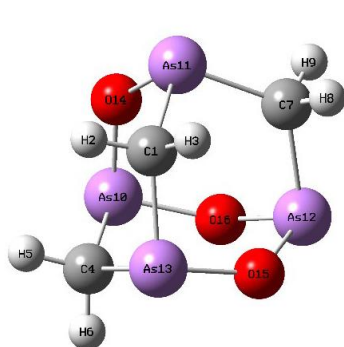

Arsenicin A (**1**)

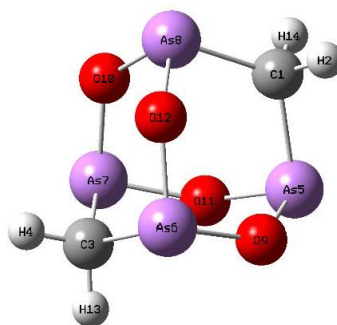

**2**

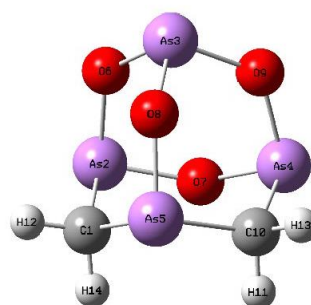

**3**

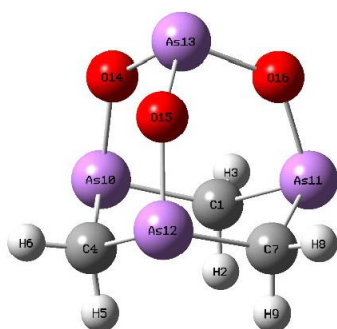

**4**

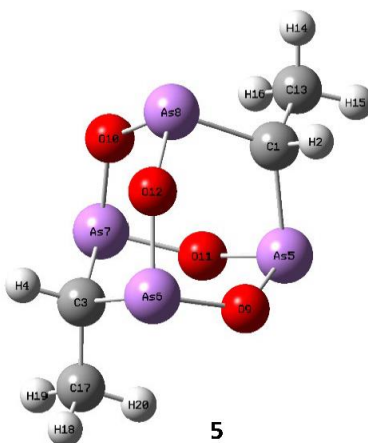

**5**

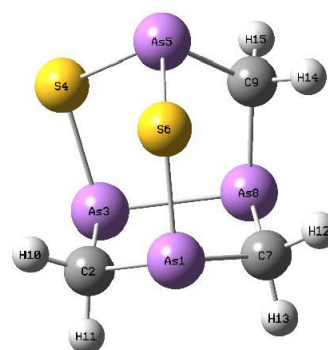

Arsenicin B (**6**)

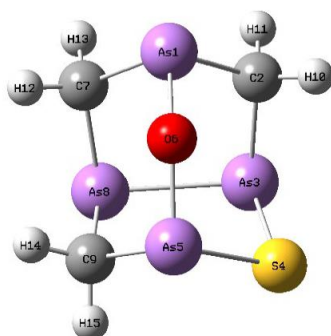

Arsenicin C (**7**)

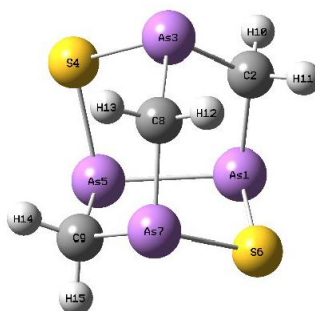

Arsenicin D (**8**)

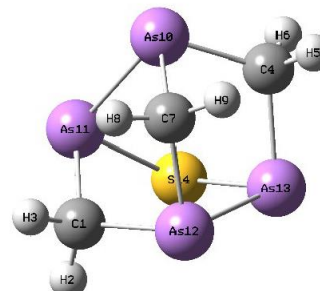

**9**

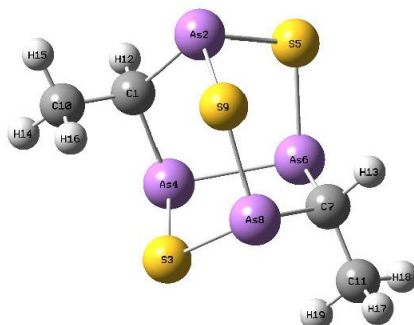

**10**

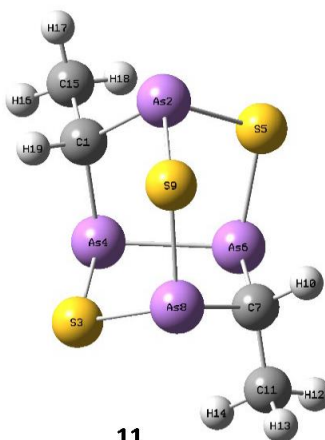

**11**

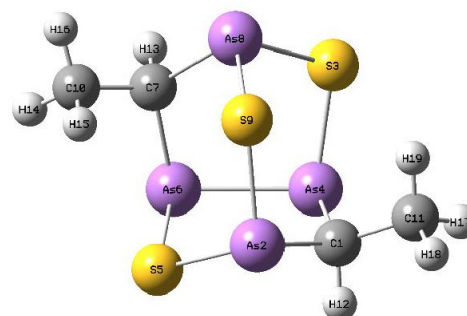

**12**

**Figure S1.** Molecular structures (energy minimized using C-PCM in chloroform, B1B95/6-311+G(3df,2pd) of polyarsenicals **1-12** evaluated in the NMR calculations.

**Table S3.** xyz Coordinates of geometry optimized structures of compounds **1-12**.

16

Arsenicin A (**1**)

|    |          |          |          |
|----|----------|----------|----------|
| C  | 0.00000  | 0.00000  | -2.11395 |
| H  | -0.58715 | 0.65000  | -2.76166 |
| H  | 0.58715  | -0.65000 | -2.76166 |
| C  | 0.00000  | 2.08822  | 0.00450  |
| H  | -0.63726 | 2.69567  | -0.63857 |
| H  | 0.57605  | 2.76996  | 0.62789  |
| C  | 0.00000  | -2.08822 | 0.00450  |
| H  | 0.63726  | -2.69567 | -0.63857 |
| H  | -0.57605 | -2.76996 | 0.62789  |
| As | -1.19429 | 1.09604  | 1.19553  |
| As | -1.26429 | -1.14870 | -1.15950 |
| As | 1.19429  | -1.09604 | 1.19553  |
| As | 1.26429  | 1.14870  | -1.15950 |
| O  | -1.97676 | 0.02490  | 0.00994  |
| O  | 1.97676  | -0.02490 | 0.00994  |
| O  | 0.00000  | 0.00000  | 1.95466  |

14

COMPOUND **2**

|    |          |          |          |
|----|----------|----------|----------|
| C  | 0.00000  | -2.06517 | 0.00000  |
| H  | -0.62210 | -2.70786 | 0.62210  |
| C  | 0.00000  | 2.06517  | 0.00000  |
| H  | 0.62210  | 2.70786  | 0.62210  |
| As | -1.19861 | -1.08662 | -1.19862 |
| As | -1.19861 | 1.08662  | 1.19862  |
| As | 1.19861  | 1.08662  | -1.19862 |
| As | 1.19861  | -1.08662 | 1.19862  |
| O  | -1.95987 | 0.00000  | 0.00000  |
| O  | 1.95987  | 0.00000  | 0.00000  |
| O  | 0.00000  | 0.00000  | -1.95987 |
| O  | 0.00000  | 0.00000  | 1.95987  |
| H  | -0.62210 | 2.70786  | -0.62210 |
| H  | 0.62210  | -2.70786 | -0.62210 |

14

COMPOUND 3

|    |          |          |          |
|----|----------|----------|----------|
| C  | 0.86176  | -1.48452 | -1.20073 |
| As | -1.00799 | -1.61647 | -0.64833 |
| As | -0.01971 | -0.00113 | 1.96165  |
| As | -1.00819 | 1.61710  | -0.64648 |
| As | 1.97899  | 0.00049  | -0.58318 |
| O  | -0.79925 | -1.35789 | 1.11458  |
| O  | -1.57536 | 0.00057  | -1.15826 |
| O  | 1.56274  | -0.00061 | 1.17867  |
| O  | -0.79937 | 1.35653  | 1.11612  |
| C  | 0.86145  | 1.48588  | -1.19930 |
| H  | 0.86417  | 1.46062  | -2.28912 |
| H  | 1.34987  | -2.40870 | -0.89587 |
| H  | 1.34952  | 2.40989  | -0.89383 |
| H  | 0.86475  | -1.45840 | -2.29052 |

.....

16

COMPOUND 4

|    |          |          |          |
|----|----------|----------|----------|
| C  | 1.48723  | 0.85865  | -1.23033 |
| H  | 1.41373  | 0.81622  | -2.31782 |
| H  | 2.40600  | 1.38910  | -0.99151 |
| C  | -1.48723 | 0.85865  | -1.23033 |
| H  | -1.41373 | 0.81622  | -2.31782 |
| H  | -2.40600 | 1.38910  | -0.99151 |
| C  | 0.00000  | -1.71730 | -1.23033 |
| H  | 0.00000  | -2.77820 | -0.99151 |
| H  | 0.00000  | -1.63244 | -2.31782 |
| As | 0.00000  | 1.97116  | -0.61049 |
| As | 1.70708  | -0.98558 | -0.61049 |
| As | -1.70708 | -0.98558 | -0.61049 |
| As | 0.00000  | 0.00000  | 1.96402  |
| O  | 0.00000  | 1.57476  | 1.15415  |
| O  | -1.36378 | -0.78738 | 1.15415  |
| O  | 1.36378  | -0.78738 | 1.15415  |

.....

20

COMPOUND 5

|    |          |          |          |
|----|----------|----------|----------|
| C  | 0.00000  | 2.09141  | 0.05709  |
| H  | 0.65385  | 2.67939  | 0.70344  |
| C  | 0.00000  | -2.09141 | 0.05709  |
| H  | -0.65385 | -2.67939 | 0.70344  |
| As | 1.20931  | 1.07256  | -1.11037 |
| As | 1.18022  | -1.10359 | 1.27959  |
| As | -1.20931 | -1.07256 | -1.11037 |
| As | -1.18022 | 1.10359  | 1.27959  |
| O  | 1.95917  | -0.02025 | 0.08901  |
| O  | -1.95917 | 0.02025  | 0.08901  |
| O  | 0.00000  | 0.00000  | -1.87787 |
| O  | 0.00000  | 0.00000  | 2.04135  |
| C  | -0.85959 | 3.00142  | -0.81319 |
| H  | -1.48796 | 3.65496  | -0.20867 |
| H  | -0.24727 | 3.63946  | -1.44989 |
| H  | -1.51242 | 2.41616  | -1.45848 |
| C  | 0.85959  | -3.00142 | -0.81319 |
| H  | 1.48796  | -3.65496 | -0.20867 |
| H  | 0.24727  | -3.63946 | -1.44989 |
| H  | 1.51242  | -2.41616 | -1.45848 |

.....

15

Arsenicin B (6)

|    |          |          |          |
|----|----------|----------|----------|
| As | -1.79614 | 1.22764  | -0.30163 |
| C  | -1.41396 | -0.21995 | -1.55826 |
| As | -0.16841 | -1.64653 | -1.00966 |
| S  | 1.79646  | -0.62379 | -1.32885 |
| As | 1.89658  | 0.95103  | 0.24526  |
| S  | 0.16746  | 2.30761  | -0.17294 |
| C  | -1.74887 | 0.11742  | 1.30817  |
| As | -0.38164 | -1.28949 | 1.41496  |
| C  | 1.19707  | -0.15396 | 1.69780  |
| H  | -1.05271 | 0.19600  | -2.49530 |
| H  | -2.37049 | -0.70471 | -1.75140 |
| H  | -1.63847 | 0.76617  | 2.17428  |
| H  | -2.72138 | -0.36617 | 1.37623  |
| H  | 0.97455  | 0.50540  | 2.53612  |
| H  | 2.01711  | -0.80649 | 1.98797  |

.....

15

Arsenicin C (7)

|    |          |          |          |
|----|----------|----------|----------|
| As | -1.48598 | 1.42222  | -0.46585 |
| C  | -1.27010 | -0.12908 | -1.63152 |
| As | -0.14501 | -1.59893 | -0.95513 |
| S  | 1.85429  | -0.61156 | -1.17845 |
| As | 1.72350  | 1.07600  | 0.27878  |
| O  | 0.22724  | 1.91609  | -0.20599 |
| C  | -1.79387 | 0.35084  | 1.13681  |
| As | -0.52922 | -1.12412 | 1.43301  |
| C  | 1.05411  | -0.00909 | 1.75690  |
| H  | -0.86501 | 0.17910  | -2.59231 |
| H  | -2.27034 | -0.52873 | -1.79936 |
| H  | -1.76658 | 0.99903  | 2.01065  |
| H  | -2.79838 | -0.06137 | 1.06026  |
| H  | 0.81026  | 0.66111  | 2.58160  |
| H  | 1.87426  | -0.64929 | 2.07216  |

.....

15

Arsenicin D (8)

|    |          |          |          |
|----|----------|----------|----------|
| As | -0.27434 | -1.44051 | 1.20416  |
| C  | 1.03296  | -0.10218 | 1.81270  |
| As | 1.66984  | 1.26157  | 0.56924  |
| S  | 2.09142  | -0.14799 | -1.10986 |
| As | 0.27434  | -1.44052 | -1.20416 |
| S  | -2.09142 | -0.14799 | 1.10986  |
| As | -1.66984 | 1.26157  | -0.56924 |
| C  | 0.00000  | 2.12292  | 0.00000  |
| C  | -1.03296 | -0.10218 | -1.81270 |
| H  | 1.91593  | -0.64240 | 2.14638  |
| H  | 0.58315  | 0.38475  | 2.67704  |
| H  | -0.28542 | 2.77501  | 0.82494  |
| H  | 0.28542  | 2.77502  | -0.82494 |
| H  | -0.58315 | 0.38474  | -2.67705 |
| H  | -1.91593 | -0.64240 | -2.14638 |

.....

14

COMPOUND 9

|    |          |          |          |
|----|----------|----------|----------|
| C  | 0.00000  | 0.00000  | -2.07563 |
| H  | -0.44596 | 0.76172  | -2.71178 |
| H  | 0.44596  | -0.76172 | -2.71178 |
| C  | 0.00000  | 1.98162  | -0.11090 |
| H  | -0.42938 | 2.61148  | -0.89035 |
| H  | 0.43086  | 2.61656  | 0.65814  |
| C  | 0.00000  | -1.98162 | -0.11090 |
| H  | 0.42938  | -2.61148 | -0.89035 |
| H  | -0.43086 | -2.61656 | 0.65814  |
| As | 1.36699  | 0.87661  | -0.97340 |
| As | -1.42028 | 0.92219  | 0.74043  |
| As | -1.36699 | -0.87661 | -0.97340 |
| As | 1.42028  | -0.92219 | 0.74043  |
| S  | 0.00000  | 0.00000  | 2.19055  |

19

COMPOUND 10

|    |          |          |          |
|----|----------|----------|----------|
| C  | 1.81299  | 0.02581  | 1.14406  |
| As | 2.10881  | -0.17973 | -0.79000 |
| S  | -1.18438 | -1.19652 | 1.62314  |
| As | 0.04607  | 0.65717  | 1.79126  |
| S  | 1.11312  | 1.70332  | -1.42867 |
| As | -0.77163 | 1.79438  | -0.23184 |
| C  | -1.82961 | 0.32687  | -1.03461 |
| As | -1.39739 | -1.53430 | -0.57234 |
| S  | 0.68868  | -1.81934 | -1.34080 |
| C  | 2.25520  | -1.22070 | 1.89644  |
| C  | -3.29128 | 0.55770  | -0.66948 |
| H  | 2.46471  | 0.86723  | 1.38550  |
| H  | -1.66748 | 0.41685  | -2.10842 |
| H  | 2.18376  | -1.07387 | 2.97286  |
| H  | 3.28969  | -1.46834 | 1.66479  |
| H  | 1.63172  | -2.07114 | 1.63172  |
| H  | -3.93770 | -0.18446 | -1.13690 |
| H  | -3.62092 | 1.54203  | -0.99797 |
| H  | -3.43973 | 0.49635  | 0.40751  |

## COMPOUND 11

|    |          |          |          |
|----|----------|----------|----------|
| C  | -1.77894 | -0.12759 | 1.17095  |
| As | -1.86316 | 1.21242  | -0.26437 |
| S  | 1.40609  | -0.18535 | 1.94051  |
| As | -0.28941 | -1.43075 | 1.19859  |
| S  | -1.40610 | -0.18535 | -1.94051 |
| As | 0.28941  | -1.43075 | -1.19859 |
| C  | 1.77894  | -0.12759 | -1.17095 |
| As | 1.86316  | 1.21242  | 0.26437  |
| S  | 0.00000  | 2.42209  | 0.00000  |
| H  | 1.68088  | 0.43276  | -2.10039 |
| C  | 3.08127  | -0.91814 | -1.13127 |
| H  | 3.14050  | -1.60832 | -1.97131 |
| H  | 3.94621  | -0.25737 | -1.17990 |
| H  | 3.15852  | -1.49899 | -0.21342 |
| C  | -3.08127 | -0.91814 | 1.13127  |
| H  | -3.14050 | -1.60832 | 1.97131  |
| H  | -3.94621 | -0.25736 | 1.17990  |
| H  | -3.15852 | -1.49899 | 0.21342  |
| H  | -1.68088 | 0.43276  | 2.10039  |

## COMPOUND 12

|    |          |          |          |
|----|----------|----------|----------|
| C  | -2.05471 | -0.54070 | -0.21426 |
| As | -1.66325 | 0.88409  | 1.08470  |
| S  | 0.70169  | -2.29496 | -0.34354 |
| As | -0.67719 | -1.02394 | -1.55911 |
| S  | -0.70169 | 2.29496  | -0.34350 |
| As | 0.67721  | 1.02397  | -1.55908 |
| C  | 2.05471  | 0.54070  | -0.21423 |
| As | 1.66324  | -0.88411 | 1.08470  |
| S  | -0.00002 | -0.00002 | 2.30083  |
| C  | 2.59789  | 1.78011  | 0.48123  |
| C  | -2.59790 | -1.78012 | 0.48116  |
| H  | -2.82969 | -0.07962 | -0.82887 |
| H  | 2.82970  | 0.07963  | -0.82883 |
| H  | 2.90395  | 2.53321  | -0.24313 |
| H  | 1.84235  | 2.22245  | 1.12570  |
| H  | 3.46668  | 1.53441  | 1.08950  |
| H  | -2.90395 | -2.53321 | -0.24322 |
| H  | -3.46670 | -1.53443 | 1.08943  |
| H  | -1.84237 | -2.22248 | 1.12563  |
